# Supplementary material for: Elevated Levels of miR-144-3p Induce Cholinergic Degeneration by Impairing the Maturation of NGF in Alzheimer’s Disease
Source: Front Cell Dev Biol. 2021 Apr 9;9:667412. doi: 10.3389/fcell.2021.667412 (PMC8063700; doi:10.3389/fcell.2021.667412)
Supplement: Supplementary file 2 [file Data_Sheet_2.xlsx]

## Sheet: TargetScan7
miRNA	Position in the UTR	seed match	context++ score(<-0.15)	context++ score percentile	weighted context++ score	conserved branch length	Pct
mmu-miR-667-5p	479-486	8mer	-0.62	98	-0.62	0	N/A
mmu-miR-1927	718-725	8mer	-0.59	99	-0.58	0	N/A
mmu-miR-3071-3p	623-630	8mer	-0.45	98	-0.45	0	N/A
mmu-miR-875-5p	720-726	7mer-m8	-0.45	98	-0.45	0	N/A
mmu-miR-203-5p	330-337	8mer	-0.43	97	-0.43	0.099	N/A
mmu-miR-1249-5p	515-522	8mer	-0.41	96	-0.4	0	N/A
mmu-miR-144-3p	695-702	8mer	-0.4	98	-0.4	1.613	< 0.1
mmu-miR-221-3p	150-157	8mer	-0.38	97	-0.38	0	< 0.1
mmu-miR-339-5p	239-246	8mer	-0.38	96	-0.38	0.099	N/A
mmu-miR-7056-5p	517-524	8mer	-0.38	95	-0.37	0	N/A
mmu-miR-7034-3p	75-82	8mer	-0.37	97	-0.37	0	N/A
mmu-miR-6937-3p	161-168	8mer	-0.36	97	-0.36	0	N/A
mmu-miR-222-3p	150-157	8mer	-0.35	96	-0.35	0	< 0.1
mmu-miR-7054-5p	255-262	8mer	-0.35	97	-0.35	0	N/A
mmu-miR-6999-5p	255-262	8mer	-0.35	97	-0.35	0	N/A
mmu-miR-6916-3p	290-297	8mer	-0.35	94	-0.35	0	N/A
mmu-miR-483-3p.2	379-386	8mer	-0.35	96	-0.35	0	N/A
mmu-miR-7038-5p	53-60	8mer	-0.33	96	-0.33	0	N/A
mmu-miR-5623-5p	109-116	8mer	-0.32	94	-0.32	0	N/A
mmu-miR-8093	508-514	7mer-m8	-0.32	94	-0.31	0	N/A
mmu-miR-6957-5p	51-58	8mer	-0.31	97	-0.31	0	N/A
mmu-miR-7062-5p	442-449	8mer	-0.31	93	-0.31	0	N/A
mmu-miR-6981-5p	525-532	8mer	-0.31	96	-0.31	0	N/A
mmu-miR-7242-3p	109-116	8mer	-0.3	94	-0.3	0	N/A
mmu-miR-194-1-3p	739-745	7mer-m8	-0.3	95	0	0	N/A
mmu-miR-680	246-253	8mer	-0.29	93	-0.29	0	N/A
mmu-miR-150-5p	597-604	8mer	-0.29	97	-0.29	0	< 0.1
mmu-miR-6925-5p	47-53	7mer-m8	-0.28	94	-0.28	0	N/A
mmu-miR-5046	142-148	7mer-1A	-0.28	95	-0.28	0	N/A
mmu-miR-154-3p	608-614	7mer-m8	-0.28	96	-0.28	0.099	N/A
mmu-miR-369-3p	690-697	8mer	-0.27	98	-0.27	1.578	N/A
mmu-miR-7020-3p	459-465	7mer-1A	-0.26	90	-0.26	0	N/A
mmu-miR-7020-5p	512-518	7mer-m8	-0.26	86	-0.25	0	N/A
mmu-miR-6385	491-498	8mer	-0.25	97	-0.25	0	N/A
mmu-miR-122-5p	522-528	7mer-m8	-0.25	92	-0.25	0	< 0.1
mmu-miR-7084-3p	717-723	7mer-m8	-0.25	96	-0.24	0	N/A
mmu-miR-7082-3p	130-136	7mer-m8	-0.24	91	-0.24	0	N/A
mmu-miR-669o-5p	178-184	7mer-m8	-0.23	91	-0.23	0	N/A
mmu-miR-669k-5p	502-508	7mer-m8	-0.23	85	-0.23	0	N/A
mmu-miR-6376	520-526	7mer-m8	-0.23	91	-0.23	0	N/A
mmu-miR-3060-5p	505-511	7mer-m8	-0.22	94	-0.22	0	N/A
mmu-miR-7075-5p	508-514	7mer-1A	-0.22	78	-0.22	0	N/A
mmu-miR-7039-5p	514-520	7mer-m8	-0.22	93	-0.22	0	N/A
mmu-miR-7651-5p	738-744	7mer-m8	-0.22	90	0	0	N/A
mmu-miR-7651-5p	312-318	7mer-1A	-0.21	89	-0.21	0	N/A
mmu-miR-374b-3p	362-368	7mer-m8	-0.21	92	-0.21	0	N/A
mmu-miR-6356	396-402	7mer-1A	-0.21	91	-0.21	0	N/A
mmu-miR-3070-2-3p	480-486	7mer-1A	-0.21	87	-0.21	0	N/A
mmu-miR-3070-3p	480-486	7mer-1A	-0.21	87	-0.21	0	N/A
mmu-miR-7076-5p	508-514	7mer-1A	-0.21	76	-0.21	0	N/A
mmu-miR-7663-3p	519-525	7mer-m8	-0.21	84	-0.21	0	N/A
mmu-miR-6358	520-526	7mer-m8	-0.21	89	-0.21	0	N/A
mmu-miR-574-5p	521-527	7mer-m8	-0.21	81	-0.21	0	N/A
mmu-miR-485-3p	607-613	7mer-m8	-0.21	90	-0.21	0	N/A
mmu-miR-3072-3p	428-434	7mer-m8	-0.2	79	-0.2	0	N/A
mmu-miR-582-5p	604-610	7mer-m8	-0.2	91	-0.19	0.099	N/A
mmu-miR-142a-3p.2	632-638	7mer-m8	-0.2	91	-0.19	0	N/A
mmu-miR-6925-5p	41-47	7mer-m8	-0.19	86	-0.19	0	N/A
mmu-miR-129-5p	354-361	8mer	-0.19	97	-0.19	0	< 0.1
mmu-miR-148b-3p	392-398	7mer-m8	-0.19	85	-0.19	0.099	< 0.1
mmu-miR-152-3p	392-398	7mer-m8	-0.19	85	-0.19	0.099	< 0.1
mmu-miR-148a-3p	392-398	7mer-m8	-0.19	85	-0.19	0.099	< 0.1
mmu-miR-5110	525-531	7mer-1A	-0.19	85	-0.18	0	N/A
mmu-miR-7081-5p	525-531	7mer-1A	-0.19	80	-0.19	0	N/A
mmu-miR-6374	681-687	7mer-m8	-0.19	93	-0.19	0	N/A
mmu-miR-101a-3p.2	696-702	7mer-m8	-0.19	92	-0.19	1.613	N/A
mmu-miR-101b-3p.2	696-702	7mer-m8	-0.19	92	-0.19	1.613	N/A
mmu-miR-101b-3p.1	696-702	7mer-m8	-0.19	92	-0.19	1.613	N/A
mmu-miR-382-5p	364-370	7mer-m8	-0.18	94	-0.18	0.099	N/A
mmu-miR-743b-3p	567-573	7mer-m8	-0.18	94	-0.18	0.099	N/A
mmu-miR-743a-3p	567-573	7mer-m8	-0.18	94	-0.18	0.099	N/A
mmu-miR-340-5p	576-583	8mer	-0.17	97	-0.17	1.107	N/A
mmu-miR-6930-3p	76-82	7mer-1A	-0.17	84	-0.17	0	N/A
mmu-miR-7083-3p	144-150	7mer-1A	-0.17	87	-0.17	0	N/A
mmu-miR-677-3p	207-213	7mer-m8	-0.17	93	-0.17	0	N/A
mmu-miR-6976-3p	599-605	7mer-1A	-0.17	83	-0.17	0	N/A
mmu-miR-1894-5p	599-605	7mer-1A	-0.17	81	-0.17	0	N/A
mmu-miR-6360	632-638	7mer-1A	-0.17	91	-0.17	0	N/A
mmu-miR-190b-3p	715-721	7mer-1A	-0.17	90	-0.17	0	N/A
mmu-miR-767	744-750	7mer-1A	-0.17	87	0	0	N/A
mmu-miR-1264-5p	31-37	7mer-m8	-0.16	75	-0.16	0	N/A
mmu-miR-665-3p	305-311	7mer-m8	-0.16	86	-0.16	0	N/A
mmu-miR-677-5p	326-332	7mer-1A	-0.16	88	-0.16	0	N/A
mmu-miR-6951-5p	360-367	8mer	-0.16	91	-0.16	0	N/A
mmu-miR-296-5p	430-436	7mer-m8	-0.16	72	-0.16	0.099	N/A
mmu-miR-8095	490-496	7mer-m8	-0.16	90	-0.16	0	N/A
mmu-miR-6986-5p	508-514	7mer-1A	-0.16	83	-0.16	0	N/A
mmu-miR-7030-5p	508-514	7mer-1A	-0.16	66	-0.16	0	N/A
mmu-miR-7043-5p	728-734	7mer-1A	-0.16	90	-0.12	0	N/A
mmu-miR-770-5p	744-750	7mer-1A	-0.16	80	0	0.099	N/A
mmu-miR-6999-5p	40-46	7mer-m8	-0.15	85	-0.15	0	N/A
mmu-miR-742-3p	208-215	8mer	-0.15	92	-0.15	0	N/A
mmu-miR-6976-3p	242-248	7mer-m8	-0.15	79	-0.15	0	N/A
mmu-miR-5135	289-295	7mer-1A	-0.15	63	-0.15	0	N/A
mmu-miR-6966-3p	477-483	7mer-1A	-0.15	83	-0.15	0	N/A
mmu-miR-374c-5p	689-695	7mer-m8	-0.15	85	-0.15	1.631	N/A
mmu-miR-101a-3p.1	696-702	7mer-1A	-0.15	87	-0.15	1.613	< 0.1

## Sheet: miRDB
Target Detail	Target Rank	Target Score(>70)	miRNA Name	Gene Symbol	Gene Description
Details	1	93	mmu-miR-369-3p	Plat	plasminogen activator, tissue
Details	2	92	mmu-miR-3071-3p	Plat	plasminogen activator, tissue
Details	3	91	mmu-miR-340-5p	Plat	plasminogen activator, tissue
Details	4	91	mmu-miR-126b-5p	Plat	plasminogen activator, tissue
Details	5	90	mmu-miR-7119-3p	Plat	plasminogen activator, tissue
Details	6	89	mmu-miR-466l-3p	Plat	plasminogen activator, tissue
Details	7	89	mmu-miR-7084-3p	Plat	plasminogen activator, tissue
Details	8	85	mmu-miR-6951-5p	Plat	plasminogen activator, tissue
Details	9	84	mmu-miR-6925-5p	Plat	plasminogen activator, tissue
Details	10	83	mmu-miR-21b	Plat	plasminogen activator, tissue
Details	11	82	mmu-miR-1927	Plat	plasminogen activator, tissue
Details	12	80	mmu-miR-6937-3p	Plat	plasminogen activator, tissue
Details	13	80	mmu-miR-12196-3p	Plat	plasminogen activator, tissue
Details	14	78	mmu-miR-374c-5p	Plat	plasminogen activator, tissue
Details	15	78	mmu-miR-144-3p	Plat	plasminogen activator, tissue
Details	16	76	mmu-miR-339-5p	Plat	plasminogen activator, tissue
Details	17	73	mmu-miR-7054-5p	Plat	plasminogen activator, tissue
Details	18	73	mmu-miR-203-5p	Plat	plasminogen activator, tissue
Details	19	72	mmu-miR-7043-5p	Plat	plasminogen activator, tissue
Details	20	72	mmu-miR-7034-3p	Plat	plasminogen activator, tissue
Details	21	72	mmu-miR-483-3p	Plat	plasminogen activator, tissue

## Sheet: miRcode
microRNA family	Seed position	Seed type	Transcript region	Repeat	Conservation
					Primates	Mammals	Other vert.
mmu-miR-144-3p	chr8:42032791	8-mer	3pUTR	no	0.56	0.52	0
mmu-miR-182	chr8:42038100	7-mer-m8	3pUTR,CDS,ncRNA	no	0.56	0.04	0
mmu-miR-196	chr8:42033541	8-mer	3pUTR,CDS	no	0.78	0.09	0
mmu-miR-205-5p	chr8:42036551	7-mer-A1	3pUTR,CDS	no	0.89	0.74	0.15
mmu-miR-214	chr8:42038040	7-mer-m8	3pUTR,CDS,ncRNA	no	0.78	0.7	0.62
mmu-miR-761	chr8:42038040	7-mer-m8	3pUTR,CDS,ncRNA	no	0.78	0.7	0.62
mmu-miR-3619-5p	chr8:42038040	7-mer-m8	3pUTR,CDS,ncRNA	no	0.78	0.7	0.62
mmu-miR-218	chr8:42038095	7-mer-m8	3pUTR,CDS,ncRNA	no	0.56	0	0
mmu-miR-27a-3p	chr8:42039468	7-mer-m8	3pUTR,CDS	no	0.67	0.52	0.23
mmu-miR-101a	chr8:42032791	7-mer-A1	3pUTR	no	0.56	0.43	0
mmu-miR-101b	chr8:42039470	7-mer-m8	3pUTR,CDS	no	0.56	0.13	0.15
mmu-miR-338-3p	chr8:42036463	7-mer-A1	3pUTR,CDS	no	0.67	0.35	0
mmu-miR-338-3p	chr8:42038039	7-mer-A1	3pUTR,CDS,ncRNA	no	0.67	0	0.23
mmu-miR-128	chr8:42039469	7-mer-A1	3pUTR,CDS	no	0.67	0.52	0.23
